# Supplementary material for: Genetically encoded biosensor enabled mining, characterisation and engineering of aromatic acid MFS transporters
Source: J Biol Eng. 2025 Oct 31;19:94. doi: 10.1186/s13036-025-00568-y (PMC12577307; doi:10.1186/s13036-025-00568-y)
Supplement: Supplementary file 1 — Supplementary Material 1 [file 13036_2025_568_MOESM1_ESM.xlsx]

## Sheet: Contents
Table of Contents:
Table S6 – PcaK Chimera raw data and processing for Fig. 5A
Table S7 – 2-way anova statistical analysis of data for Fig. 4B & 5A
Table S8 – TphK Chimera raw data and processing for Fig. 4A & 5C
Table S9 – 2-way anova statistical analysis of data for Fig. 4A & 5C

## Sheet: Table S6
	No MFS			WT			TM1			TM4			TM7			TM10			Full
1	565.54	623.26	602.19	956.94	1037.48	1119.22	1005.39	1079.71	1028.39	884.27	901.22	851.09	788.77	838.24	837.63	853.4	906.19	840.46	885.05	904.47	907.48
2	2441.65	2213.96	2298.53	36664.8	38879.5	33244.2	11989	11399.9	12334.1	4882.2	5004.69	4758.88	5198.16	5073.49	5510.61	5450.75	5184.77	5187.33	5076.15	5181.18	4769.26
3	980.08	1047.05	951.9	14594.9	14657.2	16779.2	1431.37	1551.84	1510.9	2325.98	2447.19	2503.93	1028.72	1100.2	1047.47	1045.72	1137.2	1094.36	2310.97	1528.58	1634.65
4	974.05	859.36	858.89	1378.14	1361.53	1450.81	1141.39	1128.02	1194.03	1173.86	1101.92	1183.39	997.56	909.54	1040.89	1035.89	1067.26	1102.62	1653.22	1501.41	1584.1
5	763.34	837.41	867.64	1216.22	1182.9	1155.28	1199.85	1077.72	1072.14	1067.29	1018.12	1055.52	1019.05	1000.7	994.09	1070.08	994.94	993.65	1532.17	1514.14	1399.05
6	880.41	888.44	887.46	1457.8	1396.28	1338.47	1116.54	1131.73	1089.23	1134.22	1073.79	1070.17	981.45	900.67	961.24	1001.47	957.87	1002.92	1430.65	1315.51	1268.61
7	1019.09	976.27	914.02	1592.93	1439.78	1428.1	1041.79	1073.83	986.25	1333.99	1318.09	1405.83	906	899.45	885.15	905.45	947.55	897.29	1225.02	1194.79	1209.87
8	929.44	969.42	902.36	1092.62	1266.47	1278.58	1097.22	1070.41	1140.64	1077.97	1034.03	1134.12	992.13	993.98	1013.32	1032.78	1041.94	1024.87	1387.93	1491.53	1496.42
9	897.39	944.73	942.61	1234.1	1245.25	1155.11	1123.35	1241.29	1123.65	1222.35	1222.88	1170.66	1045.97	1041.36	997.44	1061.91	1102.46	1044.67	1459.6	1495.54	1492.16
10	937.44	950.28	958.28	1288.5	1292.1	1200.23	1110.92	1149.46	1141.83	1203.07	1100.02	1108.94	1016.93	1013.62	1042	1030.96	1025.56	1041.62	1463.64	1354.9	1375.17
11	945.19	979.01	930.84	1373.03	1326.85	1436.56	1141.72	1206.42	1017.68	1053.02	1048.2	1007.86	975.05	1005.49	1000.88	996.98	1061.52	1015.33	1368.38	1289.95	1334.76
12	894.22	935.77	878.38	1209.11	1493.03	1134.03	1187.26	1193.16	1130.98	1199.89	1129.11	1206.59	1034.13	1044.06	1052.44	1070.35	1031.99	1090.65	1480.08	1437.9	1405.4
13	957.98	1014.54	890.07	1456.71	1131.3	1276.45	1099.74	1206.17	1119.55	1078.75	1046.82	1038.9	1006.41	978.85	996.91	1033.94	1016.82	950.9	1493.15	1428.57	1356.55
14	918.45	1012.53	1083.24	1230.17	1303.92	1311.04	1108.94	1161.95	1155.12	1096	1203.63	1076.18	1008.1	974.61	1041.67	1047.29	1055.06	1047.82	1549.77	1380.94	1519.88
15	684.22	713.43	691.86	2851.93	2889.12	3009.15	1531.68	1428.15	1396.98	1840.04	1727.67	1860.94	1719.12	1631.81	1589.65	1620.03	1571.61	1511.48	1362.45	1318.55	1350.4
16	846.33	838.91	928.23	3805.02	3472	3589.87	1099.68	1097.58	1086.2	2302.63	2514.64	2396.52	1202.7	1174.65	1166.41	1231.3	1221.51	1222.62	1350.37	1348.38	1397.25
17	1259.39	1243.39	1327.24	7649.8	8336.4	7184.05	2804.47	2988.36	3142.22	2143.87	2188.82	2210.83	4288.91	4275.82	4556.1	3826.23	3939.64	4292.72	3802.12	3949.29	4299.29
18	863.69	890.93	862.5	1534.27	1308.51	1299.59	1177.31	1245.03	1141.06	895.78	807.65	872.69	1084.26	1049.77	1050.23	1024.56	1042.35	1177.76	1163.12	1159.71	1135.8
19	1819.2	1876.4	1817.18	3950.13	3861.79	4105.11	3540.15	3483.15	3264.37	2158.12	2386.62	2292.13	3228.81	3256.8	3126.01	3456.7	3340.16	3294.84	2577.15	2587.76	2574.48
20	818.57	848.98	830.01	1054.36	1023.18	1212.84	1065.31	1083.29	1023.87	777.51	774.9	759.98	935.53	991.41	978.47	993.85	1020.87	972.48	1398.82	1461.74	1494.02
21	752.03	742.02	734.51	1220.69	1222.35	1100.63	1329.5	1174.19	1108.59	1039.6	1032.38	1064.08	994.57	1025.47	959.7	970.57	971.67	972.43	1465.36	1471.84	1457.7
22	155.67	231.04	259.47	440.57	562.99	440.49	767.41	744.08	736.2	384.32	342.08	229.43	423.73	200.96	371.62	206.83	258.36	265.41	619.14	719.78	509.93
23	882.35	848.77	860.16	1348.17	1289.76	1338.28	1086.96	1170.6	1162.02	1206.8	1195.81	1188.54	1130.95	1136.83	1151.56	1216.55	1133.18	1155.94	1650.19	1697.34	1705.33
24	10220.5	8923.84	8482.86	38962.3	38615.9	40009.8	34582.9	35038.2	33712.4	28502.8	29095	29501.8	29296.5	30436.3	31062.5	29804.6	30625.5	30028.6	31809.8	28798.5	29587.5
25	4570.89	4737.17	4769.31	27978.1	28947.7	26598.7	8286.71	8239.22	8586.57	7188.86	6966.88	6926.85	10220.5	9928.36	10197	8632.43	8755.39	8029.39	7991.28	8173.48	8152.51
26	752.57	744.74	776.29	5010.3	4862.36	4851.45	989.98	1044.37	1140.39	1475.21	1562.86	1582.41	1015.02	1021.15	1044.29	965.11	1007.89	1170.51	3403.56	3279.35	3334.62
27	999.01	1069.39	1154.61	9060.59	1308.39	1265.35	2225.41	2039.58	1909.41	2021.22	1326.58	1383.83	1414.75	1553.9	1628.66	1507.53	1521.19	1584.92	9374.21	8192.56	8109.22
28	699.76	698.77	817.51	49613.8	49482.2	49195.1	831.94	834.43	837.74	1992.37	1434.89	1413.66	960.6	966.76	979.6	1020.59	968.35	948.5	935.02	966.07	939.55
29	629.94	638.29	654.08	1325.17	1334.01	1347.51	1111.34	1100.04	1105.63	1362.87	1721.34	1274.21	1012.98	926.03	963.16	1251.73	1131.43	917.42	957.42	919.62	993.71
																										WT/ No MFS					TM1/ No MFS					TM4/ No MFS					TM7/ No MFS					TM10/ No MFS
	No MFS			WT			TM1			TM4			TM7			TM10			Full							1	2	3	Stnd Dev	Stnd Er	1	2	3	Stnd Dev	Stnd Er	1	2	3	Stnd Dev	Stnd Er	1	2	3	Stnd Dev	Stnd Er	1	2	3	Stnd Dev
P2	4.31738	3.55223	3.81695	38.3146	37.475	29.703	11.9247	10.5583	11.9936	5.52116	5.55324	5.59151	6.59021	6.05255	6.57881	6.3871	5.7215	6.17201	5.73544	5.72842	5.2555				P2	8.87451	10.5497	7.78186	1.39411	0.804887	2.76203	2.97229	3.14218	0.190435	0.109948	1.27882	1.56331	1.46492	0.14448	0.0834154	1.52644	1.70388	1.72358	0.108579	0.0626881	1.47939	1.61068	1.617	0.077688
P3	1.733	1.67996	1.58073	15.2516	14.1277	14.9919	1.4237	1.43727	1.46919	2.6304	2.71542	2.94203	1.30421	1.31251	1.25052	1.22536	1.25492	1.3021	2.61112	1.69003	1.80131				P3	8.80071	8.40955	9.48415	0.543885	0.314012	0.821522	0.855543	0.929437	0.0551718	0.0318534	1.51783	1.61636	1.86118	0.176794	0.102072	0.752573	0.781277	0.7911	0.0200199	0.0115585	0.707074	0.746998	0.823731	0.0592886
P4	1.72234	1.37881	1.42628	1.44015	1.31234	1.29627	1.13527	1.04474	1.16107	1.32749	1.2227	1.39044	1.2647	1.08506	1.24266	1.21384	1.17774	1.31192	1.86794	1.65999	1.7456				P4	0.836163	0.951791	0.908848	0.0584483	0.0337451	0.659146	0.757711	0.814054	0.0784074	0.0452685	0.77075	0.886775	0.974874	0.10238	0.059109	0.734295	0.786951	0.871262	0.0690902	0.0398892	0.704763	0.854172	0.919824	0.110215
P5	1.34975	1.3436	1.44081	1.27095	1.14017	1.03222	1.19342	0.998157	1.04254	1.20697	1.12971	1.2402	1.29195	1.19381	1.18679	1.2539	1.09794	1.18227	1.73117	1.67406	1.54169				P5	0.941614	0.848593	0.716417	0.113164	0.0653355	0.884174	0.742899	0.723582	0.0876751	0.0506192	0.894217	0.840813	0.860766	0.0269849	0.0155797	0.957173	0.888519	0.823697	0.0667472	0.0385365	0.928985	0.817163	0.82056	0.0636027
P6	1.55676	1.42547	1.47372	1.5234	1.34584	1.1959	1.11055	1.04818	1.05916	1.28266	1.19148	1.25741	1.24428	1.07448	1.14757	1.17351	1.05703	1.1933	1.61646	1.45445	1.39795				P6	0.978569	0.944135	0.81148	0.0882248	0.0509366	0.713375	0.735321	0.718698	0.0114473	0.00660913	0.823931	0.835853	0.853222	0.0147298	0.00850423	0.799275	0.753769	0.77869	0.0227871	0.0131562	0.753813	0.74153	0.809718	0.0363456
P7	1.80198	1.56639	1.51783	1.66461	1.38777	1.27598	1.0362	0.994554	0.959023	1.50858	1.46256	1.6518	1.14862	1.07302	1.05673	1.06099	1.04564	1.06762	1.38413	1.32098	1.33322				P7	0.923768	0.885963	0.840661	0.0416096	0.0240233	0.575038	0.634933	0.63184	0.033723	0.01947	0.837179	0.933713	1.08827	0.126656	0.0731247	0.637424	0.685027	0.696214	0.031218	0.0180237	0.588793	0.667548	0.703386	0.0586205
P8	1.64346	1.5554	1.49846	1.14179	1.22072	1.14238	1.09134	0.991387	1.10915	1.21905	1.14737	1.33255	1.25782	1.18579	1.20975	1.21019	1.1498	1.21942	1.56819	1.64907	1.64898				P8	0.694747	0.784824	0.762371	0.0468885	0.0270711	0.664051	0.637383	0.740192	0.0533518	0.0308027	0.741761	0.737666	0.889277	0.0863752	0.0498687	0.76535	0.762371	0.807324	0.0251379	0.0145134	0.736372	0.739232	0.813777	0.0438876
P9	1.58678	1.51579	1.5653	1.28963	1.20026	1.03207	1.11733	1.14965	1.09263	1.38233	1.35692	1.37548	1.32608	1.24232	1.19079	1.24433	1.21659	1.24297	1.64917	1.6535	1.64429				P9	0.812733	0.791842	0.65934	0.083189	0.0480292	0.704146	0.758451	0.698031	0.0332593	0.0192023	0.87115	0.895189	0.878733	0.0122894	0.00709527	0.835701	0.819585	0.76074	0.0394583	0.0227812	0.784183	0.802611	0.794079	0.00922265
P10	1.6576	1.52469	1.59132	1.34648	1.24542	1.07238	1.10496	1.0646	1.11031	1.36052	1.22059	1.30296	1.28926	1.20922	1.24399	1.20806	1.13173	1.23935	1.65374	1.498	1.51537				P10	0.812306	0.816834	0.673892	0.0812523	0.046911	0.666604	0.698239	0.697726	0.0181181	0.0104605	0.820778	0.800548	0.818792	0.0111509	0.00643796	0.777787	0.793094	0.78173	0.00794761	0.00458856	0.728801	0.742266	0.778813	0.0258787
P11	1.67131	1.57079	1.54576	1.43481	1.27892	1.28354	1.1356	1.11736	0.989586	1.19084	1.16309	1.1842	1.23617	1.19953	1.1949	1.16824	1.17141	1.20806	1.5461	1.42619	1.47084				P11	0.858498	0.814187	0.830361	0.0224233	0.0129461	0.679468	0.711334	0.640194	0.035634	0.0205733	0.712518	0.74045	0.766096	0.0267971	0.0154713	0.739641	0.763645	0.773016	0.0172139	0.00993848	0.699001	0.745746	0.781535	0.041388
P12	1.58118	1.50141	1.45864	1.26352	1.43909	1.01323	1.18089	1.10507	1.09976	1.35693	1.25287	1.4177	1.31107	1.24554	1.25645	1.25422	1.13882	1.29768	1.67231	1.58977	1.54868				P12	0.799098	0.958493	0.694641	0.132876	0.076716	0.746845	0.736024	0.75396	0.00903171	0.00521446	0.858174	0.83446	0.971931	0.0734859	0.0424271	0.82917	0.829578	0.861383	0.0184814	0.0106702	0.793217	0.758501	0.889651	0.0679518
P13	1.69392	1.6278	1.47806	1.52226	1.09043	1.14048	1.09384	1.11712	1.08864	1.21993	1.16156	1.22067	1.27592	1.16774	1.19016	1.21155	1.12208	1.1314	1.68708	1.57946	1.49485				P13	0.89866	0.669882	0.77161	0.114622	0.0661772	0.645747	0.68628	0.736538	0.0454821	0.0262591	0.720183	0.713578	0.825862	0.0630074	0.0363773	0.753237	0.717378	0.805217	0.0441657	0.0254991	0.715236	0.689326	0.765468	0.0387129
P14	1.62402	1.62457	1.79883	1.28552	1.25681	1.17139	1.10299	1.07617	1.12323	1.23944	1.33556	1.26447	1.27807	1.16269	1.24359	1.2272	1.16428	1.24672	1.75105	1.52679	1.67484				P14	0.791568	0.773629	0.651192	0.0763956	0.044107	0.679174	0.662433	0.624422	0.0280563	0.0161983	0.763191	0.822098	0.70294	0.0595802	0.0343986	0.786975	0.715688	0.691332	0.0497035	0.0286963	0.755653	0.71667	0.693072	0.0316038
P15	1.20985	1.14467	1.14891	2.98026	2.78475	2.68861	1.52347	1.32272	1.35841	2.08086	1.91703	2.18654	2.17949	1.94671	1.89779	1.89832	1.73431	1.7984	1.5394	1.45782	1.48808				P15	2.46333	2.43279	2.34015	0.0641431	0.037033	1.25922	1.15554	1.18235	0.0538154	0.0310703	1.71993	1.67474	1.90315	0.120954	0.0698331	1.80145	1.70067	1.65183	0.076302	0.044053	1.56905	1.51511	1.56531	0.0301239
P16	1.4965	1.346	1.54142	3.97624	3.34657	3.20747	1.09378	1.01655	1.05621	2.60399	2.79026	2.81582	1.52478	1.40133	1.39251	1.44282	1.34796	1.4547	1.52576	1.4908	1.5397				P16	2.65703	2.4863	2.08085	0.295948	0.170866	0.730896	0.755236	0.68522	0.035546	0.0205225	1.74005	2.073	1.82677	0.172723	0.0997217	1.0189	1.0411	0.903393	0.0739351	0.0426865	0.964128	1.00146	0.94374	0.0292691
P17	2.22688	1.99498	2.20402	7.99402	8.03524	6.4188	2.78943	2.76774	3.05548	2.42445	2.42873	2.59765	5.43747	5.10095	5.43928	4.48351	4.34748	5.10758	4.29594	4.36641	4.73761				P17	3.58979	4.02773	2.91231	0.56198	0.324459	1.25262	1.38736	1.38632	0.0774917	0.0447399	1.08872	1.21742	1.17859	0.0660159	0.0381143	2.44174	2.5569	2.46789	0.0603691	0.0348541	2.01336	2.17921	2.31739	0.152226
P18	1.5272	1.42947	1.43227	1.60331	1.26124	1.16116	1.171	1.15312	1.10956	1.01302	0.896174	1.02538	1.37462	1.25235	1.25381	1.20056	1.15026	1.40133	1.31419	1.2822	1.2516				P18	1.04984	0.882314	0.81071	0.122729	0.0708576	0.766764	0.806675	0.774685	0.0211303	0.0121996	0.663318	0.626929	0.715911	0.0447363	0.0258285	0.900095	0.876095	0.8754	0.0140613	0.0081183	0.786122	0.804674	0.978395	0.10606
P19	3.21675	3.01062	3.01762	4.12788	3.72228	3.66783	3.52117	3.22601	3.17425	2.44057	2.64821	2.69317	4.09347	3.88528	3.73197	4.0505	3.68594	3.92028	2.91187	2.86108	2.83696				P19	1.28324	1.23638	1.21547	0.0347048	0.0200368	1.09464	1.07154	1.05191	0.0213884	0.0123486	0.758706	0.879622	0.892482	0.0738038	0.0426107	1.27255	1.29053	1.23673	0.0273884	0.0158127	1.25919	1.22431	1.29913	0.0374383
P20	1.44741	1.36216	1.37832	1.1018	0.986217	1.08365	1.0596	1.00332	0.995605	0.879268	0.859834	0.892949	1.18606	1.18273	1.16814	1.16458	1.12655	1.15708	1.5805	1.61613	1.64634				P20	0.761223	0.724009	0.786209	0.0312998	0.0180709	0.732064	0.736562	0.722333	0.00727341	0.0041993	0.607475	0.631229	0.647854	0.0202938	0.0117166	0.819436	0.868274	0.847511	0.0245102	0.014151	0.804592	0.827033	0.839487	0.017684
P21	1.32976	1.19055	1.21973	1.27562	1.17819	0.98339	1.32237	1.0875	1.07799	1.17566	1.14554	1.25026	1.26091	1.22336	1.14573	1.1373	1.07226	1.15702	1.65568	1.6273	1.60632				P21	0.959288	0.989622	0.806235	0.098299	0.0567529	0.994448	0.91345	0.88379	0.0572793	0.0330702	0.884117	0.962193	1.02503	0.0705917	0.0407561	0.948229	1.02756	0.939332	0.0485757	0.0280452	0.855268	0.900644	0.948587	0.0466652
P22	0.275259	0.370696	0.430877	0.460395	0.542651	0.393569	0.763296	0.689148	0.715876	0.434618	0.379574	0.269572	0.537203	0.23974	0.443657	0.24236	0.285106	0.315791	0.699554	0.795803	0.561919				P22	1.67259	1.46387	0.913413	0.392197	0.226435	2.77301	1.85907	1.66144	0.593006	0.342372	1.57894	1.02395	0.625635	0.478795	0.276432	1.95163	0.64673	1.02966	0.670749	0.387257	0.88048	0.769109	0.732903	0.0769123
P23	1.56019	1.36182	1.42839	1.40883	1.24317	1.19573	1.08113	1.08418	1.12994	1.36474	1.32688	1.39649	1.43381	1.35621	1.37478	1.42553	1.25049	1.37537	1.86452	1.87661	1.87919				P23	0.902989	0.912869	0.837116	0.041181	0.0237759	0.692949	0.796124	0.791061	0.0581615	0.0335796	0.874728	0.97434	0.977671	0.0584965	0.033773	0.919	0.995879	0.962473	0.038549	0.0222563	0.913692	0.918246	0.962881	0.0271802
P24	18.0721	14.318	14.0867	40.7155	37.2209	35.7479	34.3975	32.4514	32.7817	32.2331	32.284	34.6635	37.142	36.3098	37.0839	34.9245	33.7958	35.7288	35.9412	31.8402	32.604				P24	2.25295	2.59959	2.53771	0.184875	0.106738	1.90335	2.26648	2.32714	0.229179	0.132316	1.78359	2.25478	2.46073	0.347121	0.200411	2.05522	2.53595	2.63255	0.309233	0.178536	1.93251	2.36037	2.53635	0.310551
P25	8.08235	7.60063	7.91994	29.2371	27.902	23.7654	8.24228	7.63096	8.34953	8.12971	7.7305	8.1388	12.9575	11.8443	12.1736	10.1153	9.66176	9.55357	9.02918	9.03676	8.98368				P25	3.6174	3.671	3.0007	0.372489	0.215056	1.01979	1.00399	1.05424	0.0256961	0.0148357	1.00586	1.01709	1.02763	0.0108884	0.0062864	1.60319	1.55833	1.53708	0.0337475	0.0194841	1.25153	1.27118	1.20627	0.0332879
P26	1.33071	1.19491	1.28911	5.23575	4.6867	4.33467	0.984673	0.967269	1.10891	1.66828	1.73416	1.85927	1.28684	1.21821	1.24672	1.1309	1.11223	1.3927	3.84561	3.62571	3.67459				P26	3.93455	3.92222	3.36253	0.326758	0.188654	0.73996	0.809491	0.860211	0.0603703	0.0348548	1.25368	1.45129	1.44229	0.111585	0.0644237	0.967032	1.0195	0.967116	0.0302664	0.0174743	0.849847	0.930804	1.08036	0.116944
P27	1.76647	1.7158	1.91735	9.46829	1.26112	1.13056	2.21348	1.88901	1.8567	2.28575	1.47198	1.62595	1.79362	1.85377	1.94437	1.7665	1.67867	1.88578	10.5917	9.05786	8.93598				P27	5.36001	0.735006	0.589649	2.71318	1.56645	1.25305	1.10095	0.968366	0.142454	0.082246	1.29396	0.857898	0.848019	0.254663	0.147029	1.01537	1.08041	1.01409	0.0379257	0.0218964	1.00002	0.978357	0.983532	0.0113107
P28	1.23733	1.12115	1.35756	51.8462	47.6946	43.9548	0.82748	0.772828	0.814613	2.25312	1.59216	1.661	1.21785	1.15332	1.16949	1.19591	1.06859	1.12855	1.05646	1.06811	1.03534				P28	41.9017	42.5407	32.3778	5.69207	3.28632	0.668762	0.689315	0.600056	0.0467442	0.0269878	1.82096	1.42011	1.22352	0.304483	0.175793	0.984252	1.02869	0.861464	0.086619	0.0500095	0.966525	0.953121	0.831306	0.0745014
P29	1.11387	1.02412	1.08617	1.3848	1.28582	1.20397	1.10538	1.01883	1.07511	1.54124	1.91001	1.49715	1.28425	1.10473	1.14986	1.46676	1.24856	1.09157	1.08177	1.01675	1.09502				P29	1.24323	1.25554	1.10846	0.0815965	0.0471097	0.992377	0.994838	0.989816	0.0025112	0.00144984	1.38367	1.86504	1.37838	0.279456	0.161344	1.15296	1.07872	1.05864	0.0496845	0.0286854	1.31681	1.21916	1.00497	0.159506
								Fold Change calculated for Induced vs uninduced for each ligand in each column																		Negative Control FC subtracted from WT and other constructs for relative improvement
[truncated: 6 more columns]

## Sheet: Table S7
Within each row, compare columns (simple effects within rows)
Number of families	28
Number of comparisons per family	6
Alpha	0.05
Dunnett's multiple comparisons test	Predicted (LS) mean diff.	95.00% CI of diff.	Below threshold?	Summary	Adjusted P Value
P2
WT PcaK vs. No MFS	31.27	29.98 to 32.56	Yes	****	<0.0001
PcaK_TphK_TM1 vs. No MFS	7.597	6.309 to 8.885	Yes	****	<0.0001
PcaK_TphK_TM4 vs. No MFS	1.66	0.3717 to 2.948	Yes	**	0.0053
PcaK_TphK_TM7 vs. No MFS	2.512	1.224 to 3.800	Yes	****	<0.0001
PcaK_TphK_TM10 vs. No MFS	2.198	0.9100 to 3.486	Yes	****	<0.0001
PcaK_TphK_TM1,4,7,10 vs. No MFS	1.678	0.3896 to 2.966	Yes	**	0.0047
P3
WT PcaK vs. No MFS	13.13	11.84 to 14.41	Yes	****	<0.0001
PcaK_TphK_TM1 vs. No MFS	-0.2212	-1.509 to 1.067	No	ns	0.9957
PcaK_TphK_TM4 vs. No MFS	1.098	-0.1900 to 2.386	No	ns	0.1265
PcaK_TphK_TM7 vs. No MFS	-0.3755	-1.664 to 0.9126	No	ns	0.9419
PcaK_TphK_TM10 vs. No MFS	-0.4038	-1.692 to 0.8843	No	ns	0.9209
PcaK_TphK_TM1,4,7,10 vs. No MFS	0.3696	-0.9185 to 1.658	No	ns	0.9458
P4
WT PcaK vs. No MFS	-0.1596	-1.448 to 1.128	No	ns	0.9993
PcaK_TphK_TM1 vs. No MFS	-0.3954	-1.683 to 0.8926	No	ns	0.9275
PcaK_TphK_TM4 vs. No MFS	-0.1956	-1.484 to 1.092	No	ns	0.9978
PcaK_TphK_TM7 vs. No MFS	-0.3117	-1.600 to 0.9764	No	ns	0.9753
PcaK_TphK_TM10 vs. No MFS	-0.2746	-1.563 to 1.013	No	ns	0.9868
PcaK_TphK_TM1,4,7,10 vs. No MFS	0.2487	-1.039 to 1.537	No	ns	0.992
P5
WT PcaK vs. No MFS	-0.2303	-1.518 to 1.058	No	ns	0.9947
PcaK_TphK_TM1 vs. No MFS	-0.3	-1.588 to 0.9880	No	ns	0.9795
PcaK_TphK_TM4 vs. No MFS	-0.1858	-1.474 to 1.102	No	ns	0.9983
PcaK_TphK_TM7 vs. No MFS	-0.1539	-1.442 to 1.134	No	ns	0.9994
PcaK_TphK_TM10 vs. No MFS	-0.2	-1.488 to 1.088	No	ns	0.9975
PcaK_TphK_TM1,4,7,10 vs. No MFS	0.2709	-1.017 to 1.559	No	ns	0.9876
P6
WT PcaK vs. No MFS	-0.1303	-1.418 to 1.158	No	ns	0.9998
PcaK_TphK_TM1 vs. No MFS	-0.4127	-1.701 to 0.8754	No	ns	0.9134
PcaK_TphK_TM4 vs. No MFS	-0.2415	-1.530 to 1.047	No	ns	0.9932
PcaK_TphK_TM7 vs. No MFS	-0.3299	-1.618 to 0.9582	No	ns	0.9677
PcaK_TphK_TM10 vs. No MFS	-0.344	-1.632 to 0.9440	No	ns	0.9607
PcaK_TphK_TM1,4,7,10 vs. No MFS	0.004304	-1.284 to 1.292	No	ns	>0.9999
P7
WT PcaK vs. No MFS	-0.1859	-1.474 to 1.102	No	ns	0.9983
PcaK_TphK_TM1 vs. No MFS	-0.6321	-1.920 to 0.6559	No	ns	0.6365
PcaK_TphK_TM4 vs. No MFS	-0.08775	-1.376 to 1.200	No	ns	>0.9999
PcaK_TphK_TM7 vs. No MFS	-0.5359	-1.824 to 0.7521	No	ns	0.7746
PcaK_TphK_TM10 vs. No MFS	-0.5706	-1.859 to 0.7174	No	ns	0.7263
PcaK_TphK_TM1,4,7,10 vs. No MFS	-0.2826	-1.571 to 1.005	No	ns	0.9847
P8
WT PcaK vs. No MFS	-0.3975	-1.686 to 0.8906	No	ns	0.9259
PcaK_TphK_TM1 vs. No MFS	-0.5018	-1.790 to 0.7862	No	ns	0.8189
PcaK_TphK_TM4 vs. No MFS	-0.3328	-1.621 to 0.9553	No	ns	0.9663
PcaK_TphK_TM7 vs. No MFS	-0.348	-1.636 to 0.9401	No	ns	0.9586
PcaK_TphK_TM10 vs. No MFS	-0.3726	-1.661 to 0.9154	No	ns	0.9438
PcaK_TphK_TM1,4,7,10 vs. No MFS	0.05631	-1.232 to 1.344	No	ns	>0.9999
P9
WT PcaK vs. No MFS	-0.382	-1.670 to 0.9061	No	ns	0.9375
PcaK_TphK_TM1 vs. No MFS	-0.4361	-1.724 to 0.8520	No	ns	0.892
PcaK_TphK_TM4 vs. No MFS	-0.1844	-1.472 to 1.104	No	ns	0.9984
PcaK_TphK_TM7 vs. No MFS	-0.3029	-1.591 to 0.9852	No	ns	0.9785
PcaK_TphK_TM10 vs. No MFS	-0.3213	-1.609 to 0.9667	No	ns	0.9714
PcaK_TphK_TM1,4,7,10 vs. No MFS	0.09303	-1.195 to 1.381	No	ns	>0.9999
P10
WT PcaK vs. No MFS	-0.3698	-1.658 to 0.9183	No	ns	0.9457
PcaK_TphK_TM1 vs. No MFS	-0.4979	-1.786 to 0.7901	No	ns	0.8237
PcaK_TphK_TM4 vs. No MFS	-0.2965	-1.585 to 0.9915	No	ns	0.9806
PcaK_TphK_TM7 vs. No MFS	-0.3437	-1.632 to 0.9443	No	ns	0.9609
PcaK_TphK_TM10 vs. No MFS	-0.3982	-1.686 to 0.8899	No	ns	0.9254
PcaK_TphK_TM1,4,7,10 vs. No MFS	-0.0355	-1.324 to 1.253	No	ns	>0.9999
P11
WT PcaK vs. No MFS	-0.2635	-1.552 to 1.025	No	ns	0.9893
PcaK_TphK_TM1 vs. No MFS	-0.5151	-1.803 to 0.7729	No	ns	0.802
PcaK_TphK_TM4 vs. No MFS	-0.4166	-1.705 to 0.8715	No	ns	0.9101
PcaK_TphK_TM7 vs. No MFS	-0.3858	-1.674 to 0.9023	No	ns	0.9347
PcaK_TphK_TM10 vs. No MFS	-0.4134	-1.701 to 0.8747	No	ns	0.9128
PcaK_TphK_TM1,4,7,10 vs. No MFS	-0.1149	-1.403 to 1.173	No	ns	0.9999
P12
WT PcaK vs. No MFS	-0.2751	-1.563 to 1.013	No	ns	0.9866
PcaK_TphK_TM1 vs. No MFS	-0.3852	-1.673 to 0.9029	No	ns	0.9352
PcaK_TphK_TM4 vs. No MFS	-0.1712	-1.459 to 1.117	No	ns	0.9989
PcaK_TphK_TM7 vs. No MFS	-0.2427	-1.531 to 1.045	No	ns	0.993
PcaK_TphK_TM10 vs. No MFS	-0.2835	-1.572 to 1.005	No	ns	0.9845
PcaK_TphK_TM1,4,7,10 vs. No MFS	0.08984	-1.198 to 1.378	No	ns	>0.9999
P13
WT PcaK vs. No MFS	-0.3489	-1.637 to 0.9392	No	ns	0.9582
PcaK_TphK_TM1 vs. No MFS	-0.5001	-1.788 to 0.7880	No	ns	0.821
PcaK_TphK_TM4 vs. No MFS	-0.3992	-1.687 to 0.8888	No	ns	0.9246
PcaK_TphK_TM7 vs. No MFS	-0.3886	-1.677 to 0.8994	No	ns	0.9326
PcaK_TphK_TM10 vs. No MFS	-0.4449	-1.733 to 0.8431	No	ns	0.8833
PcaK_TphK_TM1,4,7,10 vs. No MFS	-0.01279	-1.301 to 1.275	No	ns	>0.9999
P14
WT PcaK vs. No MFS	-0.4446	-1.733 to 0.8435	No	ns	0.8836
PcaK_TphK_TM1 vs. No MFS	-0.5817	-1.870 to 0.7064	No	ns	0.7105
PcaK_TphK_TM4 vs. No MFS	-0.4027	-1.691 to 0.8854	No	ns	0.9218
PcaK_TphK_TM7 vs. No MFS	-0.4544	-1.742 to 0.8337	No	ns	0.8735
PcaK_TphK_TM10 vs. No MFS	-0.4697	-1.758 to 0.8183	No	ns	0.8568
PcaK_TphK_TM1,4,7,10 vs. No MFS	-0.03158	-1.320 to 1.256	No	ns	>0.9999
P15
WT PcaK vs. No MFS	1.65	0.3620 to 2.938	Yes	**	0.0057
PcaK_TphK_TM1 vs. No MFS	0.2337	-1.054 to 1.522	No	ns	0.9943
PcaK_TphK_TM4 vs. No MFS	0.8937	-0.3944 to 2.182	No	ns	0.29
PcaK_TphK_TM7 vs. No MFS	0.8402	-0.4479 to 2.128	No	ns	0.3497
PcaK_TphK_TM10 vs. No MFS	0.6425	-0.6455 to 1.931	No	ns	0.621
PcaK_TphK_TM1,4,7,10 vs. No MFS	0.3273	-0.9608 to 1.615	No	ns	0.9689
P16
WT PcaK vs. No MFS	2.049	0.7607 to 3.337	Yes	***	0.0003
PcaK_TphK_TM1 vs. No MFS	-0.4058	-1.694 to 0.8823	No	ns	0.9192
PcaK_TphK_TM4 vs. No MFS	1.275	-0.01266 to 2.563	No	ns	0.0535
PcaK_TphK_TM7 vs. No MFS	-0.02177	-1.310 to 1.266	No	ns	>0.9999
PcaK_TphK_TM10 vs. No MFS	-0.04615	-1.334 to 1.242	No	ns	>0.9999
PcaK_TphK_TM1,4,7,10 vs. No MFS	0.05744	-1.231 to 1.345	No	ns	>0.9999
P17
WT PcaK vs. No MFS	5.341	4.053 to 6.629	Yes	****	<0.0001
PcaK_TphK_TM1 vs. No MFS	0.7289	-0.5591 to 2.017	No	ns	0.495
PcaK_TphK_TM4 vs. No MFS	0.3416	-0.9464 to 1.630	No	ns	0.962
PcaK_TphK_TM7 vs. No MFS	3.184	1.896 to 4.472	Yes	****	<0.0001
PcaK_TphK_TM10 vs. No MFS	2.504	1.216 to 3.792	Yes	****	<0.0001
PcaK_TphK_TM1,4,7,10 vs. No MFS	2.325	1.037 to 3.613	Yes	****	<0.0001
P18
WT PcaK vs. No MFS	-0.1211	-1.409 to 1.167	No	ns	0.9999
PcaK_TphK_TM1 vs. No MFS	-0.3184	-1.606 to 0.9696	No	ns	0.9726
PcaK_TphK_TM4 vs. No MFS	-0.4848	-1.773 to 0.8033	No	ns	0.8395
PcaK_TphK_TM7 vs. No MFS	-0.1694	-1.457 to 1.119	No	ns	0.999
PcaK_TphK_TM10 vs. No MFS	-0.2123	-1.500 to 1.076	No	ns	0.9966
PcaK_TphK_TM1,4,7,10 vs. No MFS	-0.1803	-1.468 to 1.108	No	ns	0.9986
P19
WT PcaK vs. No MFS	0.7577	-0.5304 to 2.046	No	ns	0.4551
PcaK_TphK_TM1 vs. No MFS	0.2255	-1.063 to 1.514	No	ns	0.9953
PcaK_TphK_TM4 vs. No MFS	-0.4877	-1.776 to 0.8004	No	ns	0.8361
PcaK_TphK_TM7 vs. No MFS	0.8219	-0.4661 to 2.110	No	ns	0.3717
PcaK_TphK_TM10 vs. No MFS	0.8039	-0.4841 to 2.092	No	ns	0.3942
PcaK_TphK_TM1,4,7,10 vs. No MFS	-0.2117	-1.500 to 1.076	No	ns	0.9966
P20
WT PcaK vs. No MFS	-0.3387	-1.627 to 0.9493	No	ns	0.9634
PcaK_TphK_TM1 vs. No MFS	-0.3765	-1.665 to 0.9116	No	ns	0.9413
PcaK_TphK_TM4 vs. No MFS	-0.5186	-1.807 to 0.7694	No	ns	0.7975
PcaK_TphK_TM7 vs. No MFS	-0.217	-1.505 to 1.071	No	ns	0.9961
PcaK_TphK_TM10 vs. No MFS	-0.2466	-1.535 to 1.041	No	ns	0.9924
PcaK_TphK_TM1,4,7,10 vs. No MFS	0.2184	-1.070 to 1.506	No	ns	0.996
P21
WT PcaK vs. No MFS	-0.1009	-1.389 to 1.187	No	ns	>0.9999
PcaK_TphK_TM1 vs. No MFS	-0.08406	-1.372 to 1.204	No	ns	>0.9999
PcaK_TphK_TM4 vs. No MFS	-0.05619	-1.344 to 1.232	No	ns	>0.9999
PcaK_TphK_TM7 vs. No MFS	-0.03668	-1.325 to 1.251	No	ns	>0.9999
PcaK_TphK_TM10 vs. No MFS	-0.1245	-1.413 to 1.164	No	ns	0.9998
PcaK_TphK_TM1,4,7,10 vs. No MFS	0.3831	-0.9050 to 1.671	No	ns	0.9367
P22
WT PcaK vs. No MFS	0.1066	-1.181 to 1.395	No	ns	>0.9999
PcaK_TphK_TM1 vs. No MFS	0.3638	-0.9242 to 1.652	No	ns	0.9495
PcaK_TphK_TM4 vs. No MFS	0.002311	-1.286 to 1.290	No	ns	>0.9999
PcaK_TphK_TM7 vs. No MFS	0.04792	-1.240 to 1.336	No	ns	>0.9999
PcaK_TphK_TM10 vs. No MFS	-0.07786	-1.366 to 1.210	No	ns	>0.9999
PcaK_TphK_TM1,4,7,10 vs. No MFS	0.3268	-0.9612 to 1.615	No	ns	0.9691
P23
WT PcaK vs. No MFS	-0.1676	-1.456 to 1.120	No	ns	0.9991
PcaK_TphK_TM1 vs. No MFS	-0.3517	-1.640 to 0.9363	No	ns	0.9566
PcaK_TphK_TM4 vs. No MFS	-0.08743	-1.375 to 1.201	No	ns	>0.9999
PcaK_TphK_TM7 vs. No MFS	-0.06186	-1.350 to 1.226	No	ns	>0.9999
PcaK_TphK_TM10 vs. No MFS	-0.09967	-1.388 to 1.188	No	ns	>0.9999
PcaK_TphK_TM1,4,7,10 vs. No MFS	0.4233	-0.8647 to 1.711	No	ns	0.904
P24
WT PcaK vs. No MFS	22.4	21.11 to 23.69	Yes	****	<0.0001
PcaK_TphK_TM1 vs. No MFS	17.72	16.43 to 19.01	Yes	****	<0.0001
PcaK_TphK_TM4 vs. No MFS	17.57	16.28 to 18.86	Yes	****	<0.0001
PcaK_TphK_TM7 vs. No MFS	21.35	20.06 to 22.64	Yes	****	<0.0001
PcaK_TphK_TM10 vs. No MFS	19.32	18.04 to 20.61	Yes	****	<0.0001
PcaK_TphK_TM1,4,7,10 vs. No MFS	17.97	16.68 to 19.26	Yes	****	<0.0001
P25
WT PcaK vs. No MFS	19.1	17.81 to 20.39	Yes	****	<0.0001
PcaK_TphK_TM1 vs. No MFS	0.2066	-1.081 to 1.495	No	ns	0.997
PcaK_TphK_TM4 vs. No MFS	0.132	-1.156 to 1.420	No	ns	0.9998
PcaK_TphK_TM7 vs. No MFS	4.457	3.169 to 5.746	Yes	****	<0.0001
PcaK_TphK_TM10 vs. No MFS	1.909	0.6212 to 3.197	Yes	***	0.0009
PcaK_TphK_TM1,4,7,10 vs. No MFS	1.149	-0.1391 to 2.437	No	ns	0.1002
P26
WT PcaK vs. No MFS	3.481	2.193 to 4.769	Yes	****	<0.0001
PcaK_TphK_TM1 vs. No MFS	-0.2513	-1.539 to 1.037	No	ns	0.9916
PcaK_TphK_TM4 vs. No MFS	0.4823	-0.8057 to 1.770	No	ns	0.8424
PcaK_TphK_TM7 vs. No MFS	-0.02099	-1.309 to 1.267	No	ns	>0.9999
PcaK_TphK_TM10 vs. No MFS	-0.05963	-1.348 to 1.228	No	ns	>0.9999
PcaK_TphK_TM1,4,7,10 vs. No MFS	2.444	1.156 to 3.732	Yes	****	<0.0001
P27
WT PcaK vs. No MFS	-0.604	-2.047 to 0.8390	No	ns	0.7751
PcaK_TphK_TM1 vs. No MFS	0.1865	-1.104 to 1.477	No	ns	0.9984
PcaK_TphK_TM4 vs. No MFS	-0.005314	-1.296 to 1.285	No	ns	>0.9999
PcaK_TphK_TM7 vs. No MFS	0.06404	-1.227 to 1.355	No	ns	>0.9999
PcaK_TphK_TM10 vs. No MFS	-0.02289	-1.314 to 1.268	No	ns	>0.9999
PcaK_TphK_TM1,4,7,10 vs. No MFS	7.729	6.438 to 9.019	Yes	****	<0.0001
P28
WT PcaK vs. No MFS	46.59	45.31 to 47.88	Yes	****	<0.0001
PcaK_TphK_TM1 vs. No MFS	-0.4337	-1.722 to 0.8543	No	ns	0.8943
PcaK_TphK_TM4 vs. No MFS	0.5967	-0.6913 to 1.885	No	ns	0.6887
PcaK_TphK_TM7 vs. No MFS	-0.05846	-1.347 to 1.230	No	ns	>0.9999
PcaK_TphK_TM10 vs. No MFS	-0.1077	-1.396 to 1.180	No	ns	>0.9999
PcaK_TphK_TM1,4,7,10 vs. No MFS	-0.1854	-1.473 to 1.103	No	ns	0.9984
P29
WT PcaK vs. No MFS	0.2168	-1.071 to 1.505	No	ns	0.9962
PcaK_TphK_TM1 vs. No MFS	-0.00828	-1.296 to 1.280	No	ns	>0.9999
PcaK_TphK_TM4 vs. No MFS	0.5747	-0.7133 to 1.863	No	ns	0.7205
PcaK_TphK_TM7 vs. No MFS	0.1049	-1.183 to 1.393	No	ns	>0.9999
PcaK_TphK_TM10 vs. No MFS	0.1942	-1.094 to 1.482	No	ns	0.9979
PcaK_TphK_TM1,4,7,10 vs. No MFS	-0.01021	-1.298 to 1.278	No	ns	>0.9999

## Sheet: Table S8
	TphK-ve-TphR			TphKR.Pyr-TphR			TphKPcaK_TM1-TphR			TphKPcaK_TM4-TphR			TphKPcaK_TM7-TphR			TphKPcaK_TM10-TphR			TphKPcaK_All-TphR
T1	55332	57037.3	55615.8	60856.7	61107.1	61043.9	51082.9	50124.8	54292.3	63019.4	69842.3	64041.2	28140.3	27629.8	27808.8	45373.6	49921	46924.3	50094.4	46965.3	47915.8
	58451.5	57037.4	57284.5	62120.9	60074.2	60825.5	48425.7	45901.6	48791.5	69827.9	61913.9	70621	28132.6	27966.3	28174	45443.1	41536.2	44451.6	41782.2	47576.7	47916.4
	59214.9	60564.4	62937.5	121080	115483	116242	48052.1	53951.2	46514.6	66060.9	68609.8	72175.9	30469.5	30350.7	30380.9	47960.8	39783.3	47148	50379	38032.5	44878.8
	58206.4	57643.8	56665	61378	60507.1	61872.4	49852.6	47860.3	45118.9	75247.9	74606.1	68597.9	29737.9	29269	28701.9	33384.2	46263.8	35058.2	36973.3	50003.7	46851.8
	55167.6	55062.8	56221.1	59876.3	66039.2	58429.4	49529	49117.7	45214.2	79048.5	75655.9	74115.1	29778.1	28806.6	29197.2	59117.5	47240.7	46853	56173.9	57409	62406.6
	60826.9	58706.1	56525.5	54591	55196.7	57088.8	51864.2	45361	47756.5	77169.9	75453.8	75503.9	28704.8	30238.8	30903.3	50006.6	49825.7	46301.3	59790.3	54066.2	57145.5
	56839.5	58259.6	57705.7	56738	58889.6	58100.8	52875.5	50634.3	31163.1	74844.6	74624.3	75105.4	31374.3	31014.9	29854.2	48382	46013.1	49008.7	59846.9	56451.4	54884.2
	56525.2	58211.9	79179.7	55424.5	57444.4	54917.2	51697	54990.4	49797	76680.3	75752.6	78828.8	30253.8	30928.3	30250.5	48213.6	43732.7	50374.2	61451.9	58428.7	55943.5
	55703.6	55281.2	56850.5	55599.5	55812.5	56734.9	52171.6	53617.4	42837.6	60574.6	60420.1	60542.3	29453	27689.9	28538.4	47310.7	47747.8	46400.4	38961.5	62308.1	61969.9
	58429.6	60567.3	58334.9	56599.3	56095.3	58667.3	49489.6	48240.6	51185.3	60650	62810	59042.1	29074.7	29734.1	30062.3	48009.9	48942.2	46137.2	57306.2	55020.1	55124.3
	58335.1	58382.5	58264.2	55814.7	56622.2	56745.8	54910.9	50856.4	52573	62512.7	63465.4	61190.8	30810.6	30840.5	30408.5	46437.5	46749.5	35346.8	53339.2	55215.9	56639.7
	56585.9	58705.2	58110.8	57093.3	55870.5	54140.9	50893.8	49186.6	51962.9	61003.8	56879.7	61096.7	30195.7	30175.5	28025.3	48145.6	50647.6	51902.1	55546.3	56500.3	56205.7
	54298.4	54869.5	56049	60793.3	99254.1	101370	51338.7	50056.7	48828.4	63635.4	61037.6	61315.1	29310.7	27010.8	27706.1	61227.2	47644.3	50052.2	61716.2	61441.1	68111.5
	56001.1	56192.5	54949.8	48944.3	47640.8	50557.1	39468	39193.2	39195.9	48141.4	48726	51885.6	28906.6	29075.9	28642.2	36442.4	34824	36648	48684.7	49210.8	49822.8
	56234.8	58059.8	59441.8	57133.1	60218.6	62918.2	49064.5	49064.3	51735.2	63409.9	61109.6	68533.1	28898.4	29672.5	29345.7	46101.2	46453.5	46559.9	65429.4	64628.7	63257.6
	59152.9	59057.3	56586.1	78398.8	76363.7	74665.1	48185.7	48223.6	52147	65654.1	71147.9	68865.3	29033.9	30068.2	30247.2	41847.3	45641.7	48463.9	62120.1	64810.4	64358.8
	56915.4	57122.2	54501.9	55107.3	55210.7	55154.8	51930.8	49887	49401.9	74497.6	66761.1	64412.9	30763.7	30491	28024.1	47524.6	49445.1	48615.6	57780.5	57107.7	57649.7
	58923.6	61865.2	57885.7	77699.4	77136.5	73194.2	49850.5	44374.2	47038.6	71059.9	79207.6	78002.8	27687.8	27680.2	26779.8	46999.3	46584.1	45342.6	63471.8	64282.4	65863.3
	57822	59933	58679.9	56271.5	55313	56208.7	49544.7	49269.6	49333.8	68893.1	68683.6	68829.3	30783.2	30753.1	30092.9	48266.8	48718.2	46262.3	57792.3	58732.5	57633.7
	56961.5	60770.3	57174	89665.9	89129.7	90355.3	51071.9	51052	53061.5	73468.5	77276.6	76480.8	30382.2	30727.3	29808.4	47874.3	49737.2	51868.7	58555	31058.8	61612.8
	54807.3	55884.3	53332.7	59356.7	56076.6	56332.7	51313	49821.3	59718.1	76232.4	73853.1	76708.6	31664.9	28968.2	28811.5	49364.6	48934.6	48623.1	57918.1	56264	58460.8
	58981.2	59961.2	58319.6	56896.1	33106.2	61197.8	51220.2	47303.4	50335.7	72193.3	71150.4	73594.6	29932.4	30404.5	29633.8	49892.9	49587.9	47657.6	59479.4	59360.6	57475.3
	54791.3	53624.2	56087.5	54382.1	53065.7	51187.4	46949.8	48655.2	48700.8	65586.8	67200.5	71139.5	28366.7	28190.8	28036.9	47391.7	48847.9	45547.2	54499.9	54300.9	51160.6
	56416.2	59038.4	57542.4	57046.9	58702.6	57953.3	52442.7	50935.6	52704.6	71986.4	77326.5	81025.1	30513.3	30921.2	29242	48119.8	47386.7	50449.1	57708.4	57945.1	54316.4
	57385.5	56418	55501.8	58051.6	57572.7	56669.5	50747	50713	51713.9	79378.2	73842.4	72941.3	31161.4	28045.2	28336.3	49318.4	47777.7	48993	55443.9	54174.2	57513.1
	57038.4	59142.6	55980.1	56594.6	57322.8	56658.7	49397.9	45223.5	49557.1	67123.7	67993.4	69490.2	29631.9	30387	30051.7	47462.4	47862	46713.2	56341.6	55989.2	57034.4
	59843	60256.2	59635.2	56328.8	55755.8	55412.1	49284.2	51021.1	52529.4	70900.3	69768.6	72853.6	29958.3	30321.9	30101.6	48237.4	50385.1	47474.4	57250	58916.9	57418.8
	57209.5	59197	56808.8	56328.8	55755.8	55412.1	49667.4	48825.6	51111.7	73060.3	77387.7	76656.3	31089.7	31467.2	30190	47904.1	48309.2	49802	56820.4	54944.6	55167.9
																								WT/ No MFS					TM1/ No MFS					TM4/ No MFS					TM7/ No MFS					TM10/ No MFS					Full / No MFS
	TphK-ve-TphR			TphKR.Pyr-TphR			TphKPcaK_TM1-TphR			TphKPcaK_TM4-TphR			TphKPcaK_TM7-TphR			TphKPcaK_TM10-TphR			TphKPcaK_All-TphR					1	2	3	Stnd Dev	Stnd Er	1	2	3	Stnd Dev	Stnd Er	1	2	3	Stnd Dev	Stnd Er	1	2	3	Stnd Dev	Stnd Er	1	2	3	Stnd Dev	Stnd Er	1
T2	1.05638	1	1.03001	1.02077	0.983096	0.996421	0.947984	0.915747	0.898682	1.10804	0.886483	1.10274	0.999727	1.01218	1.01313	1.00153	0.832039	0.947304	0.834068	1.01302	1.00001		T2	0.966295	0.983095	0.967394	0.00939831	0.00542611	0.89739	0.915746	0.872502	0.0217038	0.0125307	1.0489	0.886481	1.07062	0.10063	0.0580987	0.946372	1.01218	0.983619	0.0329986	0.0190517	0.94808	0.832037	0.919708	0.0604939	0.0349262	0.789554
T3	1.07018	1.06184	1.13165	1.98959	1.88985	1.90423	0.94067	1.07634	0.856744	1.04826	0.982354	1.12702	1.08277	1.09848	1.09249	1.05702	0.796926	1.00477	1.00568	0.809799	0.936618		T3	1.85912	1.77979	1.68271	0.0883561	0.0510124	0.878986	1.01365	0.757076	0.128342	0.0740984	0.979523	0.925144	0.995911	0.0370444	0.0213876	1.01177	1.03451	0.965398	0.0352209	0.0203348	0.987707	0.750515	0.887879	0.11909	0.0687568	0.939733
T4	1.05195	1.01063	1.01887	1.00857	0.99018	1.01357	0.975916	0.954824	0.831037	1.19404	1.06821	1.07115	1.05677	1.05933	1.03212	0.735763	0.926742	0.747121	0.738072	1.06469	0.977794		T4	0.958759	0.979761	0.994804	0.0181047	0.0104528	0.927721	0.944777	0.815649	0.070149	0.0405006	1.13508	1.05697	1.05132	0.0468114	0.0270266	1.00459	1.04818	1.013	0.0231268	0.0133523	0.699428	0.91699	0.733287	0.117066	0.0675881	0.701623
T5	0.99703	0.965383	1.01088	0.98389	1.08071	0.95717	0.969582	0.979908	0.832791	1.25435	1.08324	1.1573	1.0582	1.04259	1.04993	1.30291	0.946309	0.99848	1.12136	1.22237	1.30242		T5	0.986822	1.11947	0.946864	0.0903532	0.0521655	0.972471	1.01505	0.823824	0.100394	0.0579627	1.25809	1.12208	1.14484	0.0728469	0.0420582	1.06136	1.07998	1.03862	0.0207134	0.0119589	1.30679	0.980242	0.987729	0.186408	0.107623	1.1247
T6	1.09931	1.02926	1.01636	0.897041	0.903278	0.935208	1.0153	0.904962	0.879618	1.22454	1.08035	1.17899	1.02006	1.09443	1.11128	1.10211	0.998091	0.986723	1.19355	1.15119	1.19262		T6	0.816005	0.877601	0.920156	0.0523648	0.0302328	0.923577	0.879237	0.865461	0.0303679	0.0175329	1.11392	1.04964	1.16001	0.0554383	0.0320073	0.927913	1.06332	1.09339	0.0881501	0.0508935	1.00255	0.969719	0.970842	0.018638	0.0107607	1.08573
T7	1.02725	1.02143	1.03758	0.932321	0.963711	0.951787	1.03509	1.01016	0.573987	1.18764	1.06847	1.17277	1.11493	1.12252	1.07355	1.0663	0.921718	1.04442	1.19468	1.20198	1.14543		T7	0.907593	0.943492	0.917317	0.0185672	0.0107198	1.00764	0.98897	0.5532	0.257151	0.148466	1.15614	1.04605	1.13029	0.0575691	0.0332375	1.08535	1.09897	1.03467	0.0338802	0.0195607	1.03802	0.90238	1.0066	0.0710013	0.0409926	1.16299
T8	1.02157	1.02059	1.42369	0.910738	0.940061	0.899633	1.01202	1.09707	0.917201	1.21677	1.08462	1.23091	1.07511	1.11938	1.0878	1.06259	0.876038	1.07352	1.22672	1.24408	1.16754		T8	0.891512	0.921093	0.631902	0.159114	0.0918646	0.990659	1.07493	0.644241	0.228256	0.131784	1.19109	1.06274	0.864588	0.164488	0.0949671	1.05241	1.0968	0.764071	0.180655	0.104301	1.04016	0.858362	0.754039	0.144799	0.0835998	1.20082
T9	1.00672	0.969211	1.0222	0.913614	0.913356	0.929411	1.02131	1.06968	0.789017	0.961205	0.865094	0.945365	1.04665	1.00218	1.02624	1.04269	0.956467	0.988835	0.777761	1.32668	1.29331		T9	0.907519	0.942371	0.909226	0.0196473	0.0113434	1.0145	1.10366	0.77188	0.171703	0.0991329	0.954793	0.892576	0.924832	0.0311156	0.0179646	1.03967	1.03401	1.00395	0.0191996	0.0110849	1.03574	0.986851	0.967359	0.0352263	0.0203379	0.772573
T10	1.05598	1.06189	1.04889	0.930043	0.917984	0.961067	0.968811	0.96241	0.942772	0.962401	0.899313	0.921939	1.03321	1.07616	1.08104	1.0581	0.980393	0.983226	1.14396	1.1715	1.15044		T10	0.880737	0.864482	0.916269	0.0264846	0.0152909	0.91745	0.906319	0.898827	0.0093708	0.00541024	0.91138	0.846899	0.878965	0.0322408	0.0186142	0.978432	1.01344	1.03065	0.0266083	0.0153623	1.00201	0.923253	0.937395	0.0419864	0.0242408	1.08332
T11	1.05427	1.02359	1.04762	0.917149	0.926605	0.929589	1.07494	1.0146	0.968333	0.991959	0.908696	0.955492	1.09489	1.11621	1.09349	1.02345	0.93647	0.753274	1.06477	1.17567	1.18207		T11	0.869935	0.905254	0.887334	0.0176605	0.0101963	1.0196	0.991218	0.924316	0.0489228	0.0282456	0.940893	0.887758	0.912059	0.0265995	0.0153572	1.03853	1.09049	1.04378	0.0286034	0.0165142	0.970762	0.914892	0.719033	0.132193	0.0763217	1.00996
T12	1.02266	1.02924	1.04486	0.93816	0.914304	0.886918	0.9963	0.981282	0.957094	0.968017	0.814402	0.954021	1.07304	1.09214	1.00778	1.06109	1.01456	1.10608	1.10883	1.20302	1.17301		T12	0.917371	0.888327	0.848837	0.0343991	0.0198603	0.974223	0.953402	0.916001	0.0295014	0.0170327	0.946566	0.791264	0.91306	0.0817267	0.047185	1.04926	1.06111	0.964515	0.0526826	0.0304163	1.03758	0.985731	1.05859	0.037502	0.0216518	1.08426
T13	0.981322	0.961994	1.00779	0.998958	1.62426	1.6606	1.00501	0.998641	0.899361	1.00977	0.873935	0.957432	1.04159	0.977598	0.996307	1.3494	0.954394	1.06666	1.232	1.30822	1.42148		T13	1.01797	1.68843	1.64777	0.375903	0.217028	1.02414	1.03809	0.89241	0.0803854	0.0464105	1.02899	0.908462	0.950032	0.0612253	0.0353485	1.06142	1.01622	0.988606	0.0367592	0.0212229	1.37509	0.992099	1.05841	0.204679	0.118171	1.25545
T14	1.01209	0.985189	0.988026	0.804254	0.779628	0.828209	0.772626	0.781913	0.721941	0.763913	0.697657	0.810191	1.02723	1.05234	1.02997	0.803165	0.697582	0.781002	0.971858	1.04781	1.0398		T14	0.794644	0.791349	0.838246	0.026177	0.0151133	0.763394	0.793668	0.730691	0.0314966	0.0181846	0.754785	0.708146	0.82001	0.0561887	0.0324406	1.01496	1.06816	1.04245	0.0266059	0.0153609	0.793568	0.708069	0.790467	0.0484924	0.0279971	0.960245
T15	1.01632	1.01793	1.06879	0.938813	0.985459	1.0307	0.960489	0.978842	0.952901	1.0062	0.874965	1.07014	1.02694	1.07393	1.05527	1.01604	0.930541	0.992234	1.30612	1.37609	1.32018		T15	0.92374	0.968104	0.964362	0.0246045	0.0142054	0.945068	0.961604	0.891567	0.0366085	0.0211359	0.990042	0.859556	1.00126	0.0787745	0.0454805	1.01045	1.05502	0.987344	0.0344007	0.0198613	0.999725	0.914154	0.928368	0.0458556	0.0264748	1.28515
T16	1.06905	1.03542	1.01745	1.28825	1.24967	1.22314	0.943284	0.962072	0.960486	1.04181	1.01869	1.07533	1.03176	1.08826	1.08768	0.922285	0.914278	1.03281	1.24006	1.37996	1.34317		T16	1.20504	1.20692	1.20216	0.0023969	0.00138385	0.882353	0.929164	0.944017	0.0321825	0.0185806	0.974512	0.983849	1.05689	0.0451076	0.0260429	0.96511	1.05103	1.06903	0.0555373	0.0320645	0.862711	0.883005	1.0151	0.0827486	0.0477749	1.15996
T17	1.02862	1.00149	0.979971	0.905525	0.903507	0.903527	1.0166	0.995256	0.909924	1.18214	0.955884	1.0058	1.09323	1.10356	1.00774	1.04741	0.990466	1.03604	1.15343	1.21595	1.20315		T17	0.880332	0.902165	0.921993	0.0208387	0.0120312	0.988317	0.993777	0.928521	0.0362028	0.0209017	1.14925	0.954463	1.02636	0.0984992	0.0568686	1.06281	1.10192	1.02834	0.0368129	0.0212539	1.01827	0.988994	1.05722	0.0342256	0.0197602	1.12134
T18	1.06491	1.08464	1.04081	1.27676	1.26232	1.19904	0.975875	0.885274	0.866394	1.12759	1.13409	1.21801	0.983921	1.00183	0.962997	1.03583	0.933156	0.966292	1.26704	1.36872	1.37456		T18	1.19894	1.16381	1.15202	0.0244056	0.0140906	0.916391	0.816188	0.832419	0.0537823	0.0310512	1.05886	1.04559	1.17025	0.0684635	0.0395274	0.923947	0.923645	0.925235	0.000844058	0.000487317	0.972692	0.860333	0.9284	0.0565971	0.0326763	1.18981
T19	1.045	1.05077	1.05509	0.924656	0.905181	0.920791	0.969889	0.982939	0.908669	1.0932	0.98341	1.07477	1.09392	1.11304	1.08213	1.06377	0.975907	0.985892	1.15367	1.25055	1.20281		T19	0.884836	0.861446	0.87271	0.0116979	0.00675376	0.928121	0.935447	0.86122	0.0409044	0.0236162	1.04613	0.935895	1.01864	0.0573781	0.0331272	1.04681	1.05926	1.02563	0.0170054	0.0098181	1.01795	0.928755	0.934411	0.0499471	0.0288369	1.10399
T20	1.02945	1.06545	1.02802	1.47339	1.45858	1.48017	0.999785	1.0185	0.977329	1.16581	1.10645	1.19424	1.07967	1.11211	1.0719	1.05512	0.996319	1.10537	1.16889	0.661313	1.28586		T20	1.43124	1.36898	1.43983	0.0386631	0.0223221	0.971184	0.955934	0.950693	0.0106449	0.00614586	1.13246	1.03848	1.1617	0.0643809	0.0371703	1.04878	1.04379	1.04269	0.00324617	0.00187418	1.02493	0.935117	1.07524	0.0709851	0.0409833	1.13545
T21	0.990517	0.979785	0.958948	0.975352	0.917677	0.922822	1.00451	0.993945	1.09994	1.20966	1.05743	1.1978	1.12525	1.04844	1.03606	1.08796	0.980242	1.0362	1.15618	1.19799	1.22007		T21	0.984689	0.936611	0.962327	0.0240589	0.0138904	1.01412	1.01445	1.14702	0.076635	0.0442453	1.22125	1.07924	1.24908	0.0910889	0.0525902	1.13603	1.07007	1.08041	0.0354718	0.0204796	1.09838	1.00047	1.08056	0.0521521	0.03011	1.16725
T22	1.06595	1.05126	1.04862	0.934918	0.541774	1.00252	1.00269	0.943712	0.927123	1.14557	1.01873	1.14918	1.06368	1.10042	1.06563	1.0996	0.993328	1.01563	1.18734	1.26392	1.19951		T22	0.877074	0.515355	0.956041	0.234975	0.135663	0.940651	0.897694	0.884139	0.029503	0.0170336	1.07469	0.969055	1.0959	0.067944	0.0392275	0.997873	1.04676	1.01622	0.0246977	0.0142592	1.03157	0.944891	0.968539	0.0448055	0.0258684	1.11388
T23	0.990229	0.940161	1.00848	0.893609	0.868405	0.838534	0.919091	0.970682	0.89701	1.04074	0.962176	1.11084	1.00805	1.02031	1.0082	1.04448	0.978505	0.970652	1.08794	1.15619	1.06772		T23	0.902427	0.923677	0.831482	0.0482783	0.0278735	0.92816	1.03246	0.889466	0.0739649	0.0427037	1.05101	1.02342	1.1015	0.0395959	0.0228607	1.01799	1.08525	0.999722	0.0450402	0.026004	1.05478	1.04078	0.962488	0.0497404	0.0287176	1.09868
T24	1.01959	1.03508	1.03464	0.937396	0.960651	0.94937	1.02662	1.01618	0.970755	1.14229	1.10716	1.2652	1.08433	1.11913	1.05154	1.06053	0.949233	1.07512	1.15199	1.23378	1.13358		T24	0.919382	0.928089	0.917583	0.00561895	0.0032441	1.00689	0.981732	0.938252	0.0347244	0.0200481	1.12034	1.06963	1.22284	0.0780506	0.0450625	1.06349	1.08119	1.01633	0.033527	0.0193568	1.04014	0.917058	1.03912	0.07077	0.0408591	1.12985
T25	1.03711	0.989143	0.99795	0.953907	0.94216	0.928339	0.993425	1.01173	0.952508	1.25958	1.05727	1.13897	1.10736	1.01503	1.01897	1.08694	0.957067	1.04409	1.10679	1.15349	1.20029		T25	0.919771	0.952502	0.930246	0.0167149	0.00965034	0.957875	1.02284	0.954465	0.0385297	0.0222452	1.21451	1.06888	1.14131	0.0728154	0.04204	1.06773	1.02618	1.02106	0.0255979	0.014779	1.04804	0.967572	1.04623	0.0459459	0.0265269	1.06718
T26	1.03084	1.03691	1.00655	0.929965	0.938071	0.928163	0.967016	0.902218	0.912783	1.06513	0.973528	1.08509	1.05301	1.09979	1.08065	1.04604	0.958754	0.995501	1.12471	1.19214	1.1903		T26	0.902143	0.904678	0.922123	0.0108779	0.00628033	0.938086	0.870101	0.906843	0.0340293	0.0196468	1.03326	0.938873	1.07802	0.0710353	0.0410122	1.0215	1.06064	1.07362	0.0271305	0.0156638	1.01474	0.924625	0.989023	0.0464221	0.0268018	1.09106
T27	1.08153	1.05644	1.07227	0.925597	0.912428	0.907742	0.96479	1.01788	0.96753	1.12505	0.998946	1.1376	1.06461	1.09743	1.08245	1.06312	1.0093	1.01172	1.14284	1.25448	1.19833		T27	0.855824	0.863685	0.84656	0.00857228	0.00494921	0.892062	0.963505	0.902318	0.0386287	0.0223023	1.04025	0.945581	1.06093	0.0615016	0.035508	0.984355	1.03881	1.00949	0.0272535	0.0157348	0.982978	0.955379	0.943532	0.0202406	0.0116859	1.05669
T28	1.03393	1.03787	1.02145	0.925597	0.912428	0.907742	0.972291	0.974081	0.941416	1.15933	1.10804	1.19698	1.10481	1.13889	1.08563	1.05577	0.967714	1.06133	1.13427	1.1699	1.15135		T28	0.895219	0.879139	0.888678	0.00808643	0.0046687	0.940381	0.938543	0.921645	0.0103275	0.00596257	1.12128	1.06761	1.17185	0.0521253	0.0300946	1.06855	1.09734	1.06283	0.0184952	0.0106782	1.02112	0.932408	1.03904	0.0570979	0.0329655	1.09704
								Fold Change calculated for Induced vs uninduced for each ligand in each column																							Negative Control FC subtracted from WT and other constructs for relative improvement
[truncated: 4 more columns]

## Sheet: Table S9
Within each row, compare columns (simple effects within rows)
Number of families	27
Number of comparisons per family	6
Alpha	0.05
Dunnett's multiple comparisons test	Mean Diff.	95.00% CI of diff.	Below threshold?	Summary	Adjusted P Value
Row 2
WT TphK vs. No MFS	-0.0287	-0.1915 to 0.1341	No	ns	0.9951
TphKPcaK_TM1 vs. No MFS	-0.108	-0.2708 to 0.05477	No	ns	0.3328
TphKPcaK_TM4 vs. No MFS	0.003626	-0.1591 to 0.1664	No	ns	>0.9999
TphKPcaK_TM7 vs. No MFS	-0.02045	-0.1832 to 0.1423	No	ns	0.9992
TphKPcaK_TM10 vs. No MFS	-0.1018	-0.2646 to 0.06093	No	ns	0.3916
TphKPcaK_All vs. No MFS	-0.07976	-0.2425 to 0.08300	No	ns	0.6377
Row 3
WT TphK vs. No MFS	0.84	0.6772 to 1.003	Yes	****	<0.0001
TphKPcaK_TM1 vs. No MFS	-0.13	-0.2927 to 0.03279	No	ns	0.1711
TphKPcaK_TM4 vs. No MFS	-0.03534	-0.1981 to 0.1274	No	ns	0.9855
TphKPcaK_TM7 vs. No MFS	0.003359	-0.1594 to 0.1661	No	ns	>0.9999
TphKPcaK_TM10 vs. No MFS	-0.135	-0.2977 to 0.02778	No	ns	0.1444
TphKPcaK_All vs. No MFS	-0.1705	-0.3333 to -0.007757	Yes	*	0.0359
Row 4
WT TphK vs. No MFS	-0.02304	-0.1858 to 0.1397	No	ns	0.9985
TphKPcaK_TM1 vs. No MFS	-0.1066	-0.2693 to 0.05621	No	ns	0.346
TphKPcaK_TM4 vs. No MFS	0.08398	-0.07878 to 0.2468	No	ns	0.5882
TphKPcaK_TM7 vs. No MFS	0.02226	-0.1405 to 0.1850	No	ns	0.9988
TphKPcaK_TM10 vs. No MFS	-0.2239	-0.3867 to -0.06118	Yes	**	0.0024
TphKPcaK_All vs. No MFS	-0.1003	-0.2631 to 0.06247	No	ns	0.4071
Row 5
WT TphK vs. No MFS	0.01616	-0.1466 to 0.1789	No	ns	0.9998
TphKPcaK_TM1 vs. No MFS	-0.06367	-0.2264 to 0.09909	No	ns	0.8162
TphKPcaK_TM4 vs. No MFS	0.1739	0.01110 to 0.3366	Yes	*	0.031
TphKPcaK_TM7 vs. No MFS	0.05914	-0.1036 to 0.2219	No	ns	0.8586
TphKPcaK_TM10 vs. No MFS	0.09147	-0.07130 to 0.2542	No	ns	0.5021
TphKPcaK_All vs. No MFS	0.2243	0.06152 to 0.3871	Yes	**	0.0024
Row 6
WT TphK vs. No MFS	-0.1365	-0.2992 to 0.02630	No	ns	0.1371
TphKPcaK_TM1 vs. No MFS	-0.115	-0.2778 to 0.04775	No	ns	0.2729
TphKPcaK_TM4 vs. No MFS	0.113	-0.04978 to 0.2757	No	ns	0.2894
TphKPcaK_TM7 vs. No MFS	0.02695	-0.1358 to 0.1897	No	ns	0.9965
TphKPcaK_TM10 vs. No MFS	-0.01933	-0.1821 to 0.1434	No	ns	0.9994
TphKPcaK_All vs. No MFS	0.1308	-0.03195 to 0.2936	No	ns	0.1663
Row 7
WT TphK vs. No MFS	-0.07948	-0.2422 to 0.08329	No	ns	0.6411
TphKPcaK_TM1 vs. No MFS	-0.1557	-0.3184 to 0.007096	No	ns	0.0669
TphKPcaK_TM4 vs. No MFS	0.1142	-0.04856 to 0.2770	No	ns	0.2794
TphKPcaK_TM7 vs. No MFS	0.07491	-0.08785 to 0.2377	No	ns	0.6943
TphKPcaK_TM10 vs. No MFS	-0.01794	-0.1807 to 0.1448	No	ns	0.9996
TphKPcaK_All vs. No MFS	0.1519	-0.01082 to 0.3147	No	ns	0.0774
Row 8
WT TphK vs. No MFS	-0.2385	-0.4012 to -0.07571	Yes	**	0.001
TphKPcaK_TM1 vs. No MFS	-0.1465	-0.3093 to 0.01625	No	ns	0.0953
TphKPcaK_TM4 vs. No MFS	0.02215	-0.1406 to 0.1849	No	ns	0.9988
TphKPcaK_TM7 vs. No MFS	-0.06119	-0.2240 to 0.1016	No	ns	0.8401
TphKPcaK_TM10 vs. No MFS	-0.1512	-0.3140 to 0.01153	No	ns	0.0796
TphKPcaK_All vs. No MFS	0.0575	-0.1053 to 0.2203	No	ns	0.8728
Row 9
WT TphK vs. No MFS	-0.08058	-0.2433 to 0.08218	No	ns	0.6281
TphKPcaK_TM1 vs. No MFS	-0.03937	-0.2021 to 0.1234	No	ns	0.9753
TphKPcaK_TM4 vs. No MFS	-0.07549	-0.2383 to 0.08728	No	ns	0.6876
TphKPcaK_TM7 vs. No MFS	0.02565	-0.1371 to 0.1884	No	ns	0.9973
TphKPcaK_TM10 vs. No MFS	-0.003378	-0.1661 to 0.1594	No	ns	>0.9999
TphKPcaK_All vs. No MFS	0.1332	-0.02956 to 0.2960	No	ns	0.1534
Row 10
WT TphK vs. No MFS	-0.1192	-0.2820 to 0.04354	No	ns	0.2408
TphKPcaK_TM1 vs. No MFS	-0.09759	-0.2604 to 0.06518	No	ns	0.4353
TphKPcaK_TM4 vs. No MFS	-0.1277	-0.2905 to 0.03506	No	ns	0.1843
TphKPcaK_TM7 vs. No MFS	0.007881	-0.1549 to 0.1706	No	ns	>0.9999
TphKPcaK_TM10 vs. No MFS	-0.04835	-0.2111 to 0.1144	No	ns	0.937
TphKPcaK_All vs. No MFS	0.09971	-0.06305 to 0.2625	No	ns	0.4131
Row 11
WT TphK vs. No MFS	-0.1174	-0.2801 to 0.04539	No	ns	0.2545
TphKPcaK_TM1 vs. No MFS	-0.02254	-0.1853 to 0.1402	No	ns	0.9987
TphKPcaK_TM4 vs. No MFS	-0.08978	-0.2525 to 0.07299	No	ns	0.5212
TphKPcaK_TM7 vs. No MFS	0.0597	-0.1031 to 0.2225	No	ns	0.8537
TphKPcaK_TM10 vs. No MFS	-0.1374	-0.3002 to 0.02534	No	ns	0.1326
TphKPcaK_All vs. No MFS	0.09901	-0.06375 to 0.2618	No	ns	0.4204
Row 12
WT TphK vs. No MFS	-0.1191	-0.2819 to 0.04364	No	ns	0.2415
TphKPcaK_TM1 vs. No MFS	-0.05403	-0.2168 to 0.1087	No	ns	0.9001
TphKPcaK_TM4 vs. No MFS	-0.1201	-0.2829 to 0.04266	No	ns	0.2344
TphKPcaK_TM7 vs. No MFS	0.0254	-0.1374 to 0.1882	No	ns	0.9974
TphKPcaK_TM10 vs. No MFS	0.02832	-0.1344 to 0.1911	No	ns	0.9954
TphKPcaK_All vs. No MFS	0.1294	-0.03340 to 0.2921	No	ns	0.1746
Row 13
WT TphK vs. No MFS	0.4442	0.2815 to 0.6070	Yes	****	<0.0001
TphKPcaK_TM1 vs. No MFS	-0.01603	-0.1788 to 0.1467	No	ns	0.9998
TphKPcaK_TM4 vs. No MFS	-0.03665	-0.1994 to 0.1261	No	ns	0.9826
TphKPcaK_TM7 vs. No MFS	0.02146	-0.1413 to 0.1842	No	ns	0.999
TphKPcaK_TM10 vs. No MFS	0.1398	-0.02298 to 0.3025	No	ns	0.122
TphKPcaK_All vs. No MFS	0.3369	0.1741 to 0.4996	Yes	****	<0.0001
Row 14
WT TphK vs. No MFS	-0.1911	-0.3538 to -0.02831	Yes	*	0.0139
TphKPcaK_TM1 vs. No MFS	-0.2363	-0.3990 to -0.07351	Yes	**	0.0012
TphKPcaK_TM4 vs. No MFS	-0.2378	-0.4006 to -0.07508	Yes	**	0.0011
TphKPcaK_TM7 vs. No MFS	0.04141	-0.1214 to 0.2042	No	ns	0.9686
TphKPcaK_TM10 vs. No MFS	-0.2345	-0.3973 to -0.07175	Yes	**	0.0013
TphKPcaK_All vs. No MFS	0.02472	-0.1380 to 0.1875	No	ns	0.9978
Row 15
WT TphK vs. No MFS	-0.04935	-0.2121 to 0.1134	No	ns	0.9312
TphKPcaK_TM1 vs. No MFS	-0.07027	-0.2330 to 0.09250	No	ns	0.7468
TphKPcaK_TM4 vs. No MFS	-0.05058	-0.2133 to 0.1122	No	ns	0.9237
TphKPcaK_TM7 vs. No MFS	0.0177	-0.1451 to 0.1805	No	ns	0.9997
TphKPcaK_TM10 vs. No MFS	-0.05474	-0.2175 to 0.1080	No	ns	0.8947
TphKPcaK_All vs. No MFS	0.2998	0.1370 to 0.4626	Yes	****	<0.0001
Row 16
WT TphK vs. No MFS	0.213	0.05028 to 0.3758	Yes	**	0.0045
TphKPcaK_TM1 vs. No MFS	-0.08536	-0.2481 to 0.07741	No	ns	0.5721
TphKPcaK_TM4 vs. No MFS	0.004637	-0.1581 to 0.1674	No	ns	>0.9999
TphKPcaK_TM7 vs. No MFS	0.02859	-0.1342 to 0.1914	No	ns	0.9952
TphKPcaK_TM10 vs. No MFS	-0.08418	-0.2469 to 0.07858	No	ns	0.5859
TphKPcaK_All vs. No MFS	0.2804	0.1177 to 0.4432	Yes	****	<0.0001
Row 17
WT TphK vs. No MFS	-0.09917	-0.2619 to 0.06359	No	ns	0.4187
TphKPcaK_TM1 vs. No MFS	-0.02943	-0.1922 to 0.1333	No	ns	0.9944
TphKPcaK_TM4 vs. No MFS	0.04458	-0.1182 to 0.2073	No	ns	0.9559
TphKPcaK_TM7 vs. No MFS	0.06482	-0.09795 to 0.2276	No	ns	0.8047
TphKPcaK_TM10 vs. No MFS	0.02128	-0.1415 to 0.1840	No	ns	0.999
TphKPcaK_All vs. No MFS	0.1875	0.02472 to 0.3503	Yes	*	0.0165
Row 18
WT TphK vs. No MFS	0.1826	0.01982 to 0.3453	Yes	*	0.0208
TphKPcaK_TM1 vs. No MFS	-0.1543	-0.3170 to 0.008490	No	ns	0.0707
TphKPcaK_TM4 vs. No MFS	0.09644	-0.06633 to 0.2592	No	ns	0.4475
TphKPcaK_TM7 vs. No MFS	-0.08054	-0.2433 to 0.08222	No	ns	0.6286
TphKPcaK_TM10 vs. No MFS	-0.08503	-0.2478 to 0.07774	No	ns	0.576
TphKPcaK_All vs. No MFS	0.2733	0.1106 to 0.4361	Yes	***	0.0001
Row 19
WT TphK vs. No MFS	-0.1334	-0.2962 to 0.02935	No	ns	0.1524
TphKPcaK_TM1 vs. No MFS	-0.09646	-0.2592 to 0.06631	No	ns	0.4473
TphKPcaK_TM4 vs. No MFS	0.000171	-0.1626 to 0.1629	No	ns	>0.9999
TphKPcaK_TM7 vs. No MFS	0.04608	-0.1167 to 0.2088	No	ns	0.9489
TphKPcaK_TM10 vs. No MFS	-0.04177	-0.2045 to 0.1210	No	ns	0.9674
TphKPcaK_All vs. No MFS	0.1521	-0.01071 to 0.3148	No	ns	0.0771
Row 20
WT TphK vs. No MFS	0.4297	0.2670 to 0.5925	Yes	****	<0.0001
TphKPcaK_TM1 vs. No MFS	-0.04243	-0.2052 to 0.1203	No	ns	0.9649
TphKPcaK_TM4 vs. No MFS	0.1145	-0.04824 to 0.2773	No	ns	0.2768
TphKPcaK_TM7 vs. No MFS	0.04692	-0.1158 to 0.2097	No	ns	0.9447
TphKPcaK_TM10 vs. No MFS	0.0113	-0.1515 to 0.1741	No	ns	>0.9999
TphKPcaK_All vs. No MFS	-0.002285	-0.1651 to 0.1605	No	ns	>0.9999
Row 21
WT TphK vs. No MFS	-0.0378	-0.2006 to 0.1250	No	ns	0.9797
TphKPcaK_TM1 vs. No MFS	0.05638	-0.1064 to 0.2191	No	ns	0.882
TphKPcaK_TM4 vs. No MFS	0.1785	0.01578 to 0.3413	Yes	*	0.0251
TphKPcaK_TM7 vs. No MFS	0.0935	-0.06927 to 0.2563	No	ns	0.4794
TphKPcaK_TM10 vs. No MFS	0.05838	-0.1044 to 0.2212	No	ns	0.8652
TphKPcaK_All vs. No MFS	0.215	0.05223 to 0.3778	Yes	**	0.004
Row 22
WT TphK vs. No MFS	-0.2289	-0.3916 to -0.06611	Yes	**	0.0018
TphKPcaK_TM1 vs. No MFS	-0.09744	-0.2602 to 0.06533	No	ns	0.4369
TphKPcaK_TM4 vs. No MFS	0.04922	-0.1135 to 0.2120	No	ns	0.932
TphKPcaK_TM7 vs. No MFS	0.0213	-0.1415 to 0.1841	No	ns	0.999
TphKPcaK_TM10 vs. No MFS	-0.01909	-0.1819 to 0.1437	No	ns	0.9995
TphKPcaK_All vs. No MFS	0.1616	-0.001118 to 0.3244	No	ns	0.0524
Row 23
WT TphK vs. No MFS	-0.1128	-0.2755 to 0.04999	No	ns	0.2912
TphKPcaK_TM1 vs. No MFS	-0.0507	-0.2135 to 0.1121	No	ns	0.9229
TphKPcaK_TM4 vs. No MFS	0.05829	-0.1045 to 0.2211	No	ns	0.866
TphKPcaK_TM7 vs. No MFS	0.03256	-0.1302 to 0.1953	No	ns	0.9904
TphKPcaK_TM10 vs. No MFS	0.01825	-0.1445 to 0.1810	No	ns	0.9996
TphKPcaK_All vs. No MFS	0.1243	-0.03844 to 0.2871	No	ns	0.2055
Row 24
WT TphK vs. No MFS	-0.08063	-0.2434 to 0.08213	No	ns	0.6275
TphKPcaK_TM1 vs. No MFS	-0.02526	-0.1880 to 0.1375	No	ns	0.9975
TphKPcaK_TM4 vs. No MFS	0.1418	-0.02099 to 0.3045	No	ns	0.1135
TphKPcaK_TM7 vs. No MFS	0.05522	-0.1075 to 0.2180	No	ns	0.8911
TphKPcaK_TM10 vs. No MFS	-0.001482	-0.1642 to 0.1613	No	ns	>0.9999
TphKPcaK_All vs. No MFS	0.1433	-0.01942 to 0.3061	No	ns	0.1072
Row 25
WT TphK vs. No MFS	-0.0666	-0.2294 to 0.09617	No	ns	0.7863
TphKPcaK_TM1 vs. No MFS	-0.02218	-0.1849 to 0.1406	No	ns	0.9988
TphKPcaK_TM4 vs. No MFS	0.1439	-0.01889 to 0.3066	No	ns	0.1051
TphKPcaK_TM7 vs. No MFS	0.03905	-0.1237 to 0.2018	No	ns	0.9763
TphKPcaK_TM10 vs. No MFS	0.0213	-0.1415 to 0.1841	No	ns	0.999
TphKPcaK_All vs. No MFS	0.1455	-0.01731 to 0.3082	No	ns	0.0991
Row 26
WT TphK vs. No MFS	-0.0927	-0.2555 to 0.07007	No	ns	0.4883
TphKPcaK_TM1 vs. No MFS	-0.09743	-0.2602 to 0.06534	No	ns	0.437
TphKPcaK_TM4 vs. No MFS	0.01648	-0.1463 to 0.1792	No	ns	0.9998
TphKPcaK_TM7 vs. No MFS	0.05305	-0.1097 to 0.2158	No	ns	0.9071
TphKPcaK_TM10 vs. No MFS	-0.02467	-0.1874 to 0.1381	No	ns	0.9978
TphKPcaK_All vs. No MFS	0.1443	-0.01848 to 0.3070	No	ns	0.1036
Row 27
WT TphK vs. No MFS	-0.1548	-0.3176 to 0.007943	No	ns	0.0692
TphKPcaK_TM1 vs. No MFS	-0.08668	-0.2494 to 0.07609	No	ns	0.5568
TphKPcaK_TM4 vs. No MFS	0.01712	-0.1456 to 0.1799	No	ns	0.9997
TphKPcaK_TM7 vs. No MFS	0.01142	-0.1513 to 0.1742	No	ns	>0.9999
TphKPcaK_TM10 vs. No MFS	-0.04203	-0.2048 to 0.1207	No	ns	0.9664
TphKPcaK_All vs. No MFS	0.1285	-0.03430 to 0.2912	No	ns	0.1798
Row 28
WT TphK vs. No MFS	-0.1158	-0.2786 to 0.04694	No	ns	0.2665
TphKPcaK_TM1 vs. No MFS	-0.06849	-0.2313 to 0.09428	No	ns	0.7663
TphKPcaK_TM4 vs. No MFS	0.1237	-0.03907 to 0.2865	No	ns	0.2096
TphKPcaK_TM7 vs. No MFS	0.07869	-0.08407 to 0.2415	No	ns	0.6503
TphKPcaK_TM10 vs. No MFS	-0.002813	-0.1656 to 0.1600	No	ns	>0.9999
TphKPcaK_All vs. No MFS	0.1208	-0.04201 to 0.2835	No	ns	0.2298
